# Supplementary material for: CO2-sensitive tRNA modification associated with human mitochondrial disease
Source: PubMed Central journal article supplement (PMC5951830; doi:10.1038/s41467-018-04250-4), 2018-05-14
Supplement: 41467_2018_4250_MOESM2_ESM.pdf [file 41467_2018_4250_MOESM2_ESM.pdf]

## **Description of Additional Supplementary Files**

**File Name: Supplementary Data 1**

**Description:** List of primers and probes used in this study.
